# Supplementary material for: Derivation of visual timing-tuned neural responses from early visual stimulus representations
Source: Research Square preprint supplement (doi:10.21203/rs.3.rs-579436/v1), 2021-06-10
Supplement: Supplementary file 2 [file 7336ffdfd199c5ef8b9ac066.xlsx]

## Sheet: modVFM
	Visual Field Map and Model	V1mono	V1tuned	V2mono	V2tuned	V3mono	V3tuned	LO1mono	LO1tuned	LO2mono	LO2tuned	TO1mono	TO1tuned	TO2mono	TO2tuned	V3ABmono	V3ABtuned	IPS0mono	IPS0tuned	IPS1mono	IPS1tuned	IPS2mono	IPS2tuned	IPS3mono	IPS3tuned	IPS4mono	IPS4tuned	IPS5mono	IPS5tuned	sPCS1mono	sPCS1tuned	sPCS2mono	sPCS2tuned	iPCSmono	iPCStuned
Measure
P1LeftHemiEvenRuns		0.234768	0.0860418	0.247457	0.0102072	0.333136	0.118035	0.356841	0.0827485	0.306957	0.11982	0.41523	0.344912	0.502378	0.374239	0.343693	0.151341	0.379233	0.283274	0.197706	0.292378	0.139078	0.30321	0.16793	0.365246	0.26726	0.295015	0.278297	0.384681	0.165863	0.411057	0.311176	0.413424	0.20638	0.295035
P1LeftHemiOddRuns		0.236591	0.0111139	0.241009	0.00586214	0.330933	0.134049	0.363938	0.177043	0.312921	0.0676859	0.403082	0.277942	0.48918	0.472912	0.337744	0.250424	0.365949	0.401641	0.207045	0.295622	0.1401	0.320769	0.145015	0.358073	0.252042	0.373168	0.278676	0.418107	0.156999	0.397165	0.33208	0.442625	0.210443	0.291997
P1RightHemiEvenRuns		0.335004	0.0750719	0.3138	0.0564675	0.367086	0.0928741	0.398618	0.130615	0.399574	0.177083	0.57825	0.477225	0.48238	0.373979	0.295603	0.158266	0.321783	0.290206	0.311271	0.239195	0.0865133	0.322639	0.14511	0.312448	0.274963	0.244407	0.183081	0.320827	0.0659789	0.269616	0.208838	0.28301	0.237203	0.201299
P1RightHemiOddRuns		0.326837	0.144171	0.290774	0.0828642	0.332884	0.138786	0.369063	0.16076	0.37319	0.104648	0.531964	0.453179	0.460289	0.379499	0.292177	0.184102	0.309032	0.292393	0.411438	0.201622	0.0856233	0.316586	0.112361	0.295349	0.271586	0.320068	0.163704	0.316619	0.0559149	0.229295	0.221116	0.210518	0.256052	0.299611
P2LeftHemiEvenRuns		0.207738	0	0.228719	0.0153171	0.238782	0.241916	0.243301	0.109551	NaN	NaN	0.321859	0.442942	0.291138	0.393465	0.220026	0.197711	0.109921	0.307855	0.169232	0.450055	0.0674486	0.342859	0.110123	0.435612	0.150905	0.475489	0.140941	0.391311	0.114951	0.513366	0.136719	0.499086	0.114627	0.326075
P2LeftHemiOddRuns		0.20837	0.00601534	0.220032	0.00557329	0.227229	0.164256	0.248686	0.193897	NaN	NaN	0.33381	0.350129	0.282879	0.376389	0.233086	0.25995	0.123696	0.242295	0.157512	0.363796	0.0644582	0.369262	0.0836602	0.387843	0.131019	0.425336	0.139661	0.376763	0.0879412	0.465095	0.124722	0.452018	0.12495	0.318593
P2RightHemiEvenRuns		0.215354	0.203782	0.230403	0.283781	0.259702	0.165994	0.250323	0.0802816	0.279965	0.102807	0.339372	0.421578	0.267214	0.458775	0.302868	0.360142	0.202682	0.335721	0.0807934	0.334342	0.145699	0.385666	0.130459	0.391004	0.13609	0.335935	0.097595	0.378336	0.0750363	0.364644	0.10256	0.36822	0.146088	0.287352
P2RightHemiOddRuns		0.228553	0.0528988	0.214059	0.242177	0.245046	0.208232	0.261839	0.106198	0.271011	0.182534	0.332255	0.428652	0.240917	0.417405	0.30673	0.369846	0.180513	0.316896	0.0642165	0.312982	0.108997	0.350422	0.118391	0.367682	0.111123	0.352468	0.0935923	0.39523	0.0681952	0.338185	0.0998572	0.33352	0.133979	0.306773
P3LeftHemiEvenRuns		0.220663	0.0579177	0.249374	0.17651	0.280944	0.224704	0.245093	0.184225	0.282573	0.264573	0.299205	0.303983	0.309831	0.494659	0.193264	0.313803	0.244479	0.368946	0.0875405	0.389307	0.0448405	0.396117	0.0505971	0.438931	0.121156	0.415426	0.0971393	0.44237	0.0582093	0.465518	0.11859	0.482339	0.142739	0.249712
P3LeftHemiOddRuns		0.233953	0	0.277302	0.108875	0.292326	0.232518	0.279416	0.111916	0.290248	0.223321	0.321683	0.173909	0.312205	0.3683	0.206198	0.249969	0.24789	0.324902	0.0788971	0.375777	0.0436598	0.41777	0.0570211	0.448765	0.116061	0.397132	0.0921712	0.444449	0.0540839	0.473058	0.109111	0.468997	0.163886	0.173906
P3RightHemiEvenRuns		0.209299	0	0.226113	0.0562436	0.263387	0.169572	0.260311	0.169258	0.258575	0.118931	0.199172	0.179615	0.317111	0.339115	0.292712	0.201737	0.258247	0.171583	0.144567	0.286505	0.0490817	0.332777	0.0685799	0.38225	0.176326	0.266669	0.093044	0.344536	0.0554363	0.389902	0.178568	0.412331	0.239398	0.0895877
P3RightHemiOddRuns		NaN	NaN	0.216357	0.033578	0.244228	0.13169	0.282026	0.178332	0.280549	0.0399039	0.241101	0.0573677	0.316197	0.290556	0.22962	0.171637	0.252524	0.255598	0.105308	0.262311	0.0427743	0.338835	0.0618151	0.385606	0.185919	0.229437	0.0742374	0.331336	0.0518045	0.378769	0.174478	0.369642	0.253769	0.115981
P4LeftHemiEvenRuns		0.224173	0.0479277	0.258191	0.123518	0.329653	0.188509	0.339433	0.138803	0.398306	0.230722	0.369553	0.271174	0.325972	0.309525	0.354688	0.260796	0.40727	0.3914	0.264457	0.321737	0.15034	0.301465	0.263839	0.39873	0.306322	0.3478	0.376442	0.425428	0.199105	0.356159	0.273827	0.481239	0.255059	0.348773
P4LeftHemiOddRuns		0.23292	0.11401	0.269643	0.0647642	0.327268	0.124998	0.331771	0.154435	0.397793	0.260803	0.397847	0.277136	0.334736	0.129415	0.347444	0.186885	0.368221	0.322585	0.235898	0.255376	0.148803	0.311621	0.234932	0.393261	0.288458	0.305309	0.345591	0.356935	0.155539	0.354581	0.219494	0.405991	0.208543	0.351617
P4RightHemiEvenRuns		0.250798	0.0703255	0.241357	0.0366994	0.302433	0.157219	0.350852	0.0691656	0.360484	0.238563	0.404276	0.305196	0.426157	0.399443	0.32279	0.283851	0.282455	0.207185	0.165125	0.214765	0.107641	0.32433	0.180501	0.308211	0.277034	0.253802	0.264826	0.289843	0.0771683	0.298701	0.192022	0.333243	0.0909547	0.274172
P4RightHemiOddRuns		0.229631	0.0384638	0.243247	0.0720977	0.301398	0.171915	0.343448	0.117022	0.352702	0.212529	0.402256	0.245145	0.415734	0.307122	0.303858	0.249007	0.270884	0.156913	0.159243	0.22747	0.0987127	0.304575	0.153871	0.258229	0.251204	0.168496	0.246104	0.29314	0.0693691	0.309098	0.153239	0.291324	0.0949266	0.337032
P5LeftHemiEvenRuns		0.222802	0	0.245393	0.0177427	0.297185	0.168589	0.31378	0.206461	0.331975	0.0917897	0.339766	0.32523	0.30026	0.298106	0.179216	0.350646	0.268574	0.375047	0.0756035	0.289105	0.0658221	0.313247	0.122082	0.407554	0.172913	0.41141	0.157029	0.365518	0.0823046	0.329227	0.0935675	0.358669	0.20235	0.401104
P5LeftHemiOddRuns		NaN	NaN	0.223561	0.0768312	0.279561	0.256083	0.340366	0.292623	0.308397	0.124682	0.353688	0.347055	0.319447	0.350152	0.225109	0.384416	0.321286	0.407179	0.112843	0.316056	0.0593382	0.300148	0.100417	0.380173	0.169041	0.38879	0.159685	0.361412	0.0539367	0.311196	0.0842844	0.376675	0.218679	0.389517
P5RightHemiEvenRuns		0.232855	0	0.252744	0.00808706	0.307687	0.0453483	0.317766	0.0541742	0.339176	0.232285	0.44606	0.413379	0.37333	0.384718	0.399142	0.400087	0.331722	0.219525	0.23294	0.183532	0.084187	0.284551	0.0884871	0.281036	0.180469	0.256528	0.233918	0.313371	0.0633421	0.248886	0.135691	0.217438	0.227249	0.172188
P5RightHemiOddRuns		0.20986	0	0.244627	0.0447251	0.302323	0.103428	0.309419	0.0484591	0.321928	0.224434	0.4533	0.399848	0.335934	0.391253	0.393817	0.391299	0.381073	0.327942	0.285335	0.258067	0.073927	0.232243	0.0708353	0.266403	0.219424	0.229351	NaN	NaN	0.0304867	0.25153	NaN	NaN	0.219534	0.171857
P6LeftHemiEvenRuns		0.237191	0.172724	0.270179	0.020283	0.233815	0.139886	0.310781	0.0620609	0.275458	0.0132294	0.42156	0.201683	0.398537	0.424133	0.249838	0.107205	0.266887	0.200964	0.0628859	0.231698	0.162312	0.266393	0.139457	0.298913	0.308424	0.4827	0.221301	0.276079	0.076358	0.296334	0.14106	0.296502	0.0986595	0.286437
P6LeftHemiOddRuns		0.231283	0.151015	0.284831	0.0128215	0.260461	0.161075	0.318227	0.08095	0.268789	0.101609	0.438879	0.299783	0.418915	0.440932	0.25479	0.118223	0.303882	0.250087	0.20448	0.103482	0.178728	0.286243	0.144158	0.297914	0.32445	0.464655	0.233343	0.252285	0.072753	0.28816	0.116342	0.282815	0.168101	0.21199
P6RightHemiEvenRuns		0.25168	0.10354	0.328644	0.0569419	0.301047	0.169972	0.334103	0.0313264	0.322066	0.0506315	0.343491	0.0888772	0.41017	0.251551	0.302955	0.0264175	0.273416	0.229879	0.187886	0.082448	0.235867	0.282368	0.167877	0.267207	0.297459	0.303152	0.16315	0.239222	0.112192	0.265464	0.136604	0.298875	0.213605	0.165196
P6RightHemiOddRuns		0.311138	0.179467	0.312321	0.218545	0.319736	0.180392	0.355054	0.0531995	0.319993	0.0650949	0.346821	0.118507	0.415874	0.362297	0.296811	0.15944	0.295123	0.246142	0.234896	0.0244105	0.211652	0.307085	0.215068	0.213548	0.313347	0.342418	0.210701	0.136759	0.11065	0.265855	0.152835	0.269021	0.183571	0.183585
P7LeftHemiEvenRuns		0.235437	0	0.237141	0.0999433	0.276223	0.182073	0.265701	0.089036	0.22442	0.125753	0.25771	0.114662	0.325913	0.134766	0.294964	0.165092	0.333848	0.226117	0.2425	0.277988	0.109571	0.352845	0.170188	0.325902	0.217008	0.280548	0.233244	0.235667	0.17208	0.1849	0.191641	0.29986	0.224857	0.183524
P7LeftHemiOddRuns		NaN	NaN	0.221308	0.113447	0.21557	0.159275	0.258993	0.165086	0.2359	0.184058	0.241856	0.121042	0.314187	0.303164	0.270016	0.239579	0.322155	0.323696	0.243503	0.36312	0.0938523	0.296827	0.146366	0.316582	0.175718	0.301134	0.19753	0.333047	0.150774	0.256948	0.164172	0.269402	0.205687	0.288082
P7RightHemiEvenRuns		NaN	NaN	NaN	NaN	0.250983	0.176508	0.334982	0.172678	0.307918	0.172621	0.401249	0.157844	0.323843	0.210542	0.258849	0.0601813	0.280957	0.138308	0.258222	0.105439	0.196852	0.160293	0.172308	0.273157	0.222248	0.133648	0.185044	0.23835	0.204274	0.31927	NaN	NaN	0.218051	0.132558
P7RightHemiOddRuns		NaN	NaN	NaN	NaN	0.262299	0.221021	0.332956	0.274228	0.263687	0.189419	0.369798	0.334146	0.316556	0.316821	0.25378	0.168701	0.302586	0.196872	0.244714	0.216395	0.161163	0.231977	0.149345	0.291272	0.205486	0.225396	0.197986	0.292638	0.164064	0.271127	NaN	NaN	0.250506	0.242887
P8LeftHemiEvenRuns		NaN	NaN	0.209791	0	0.293428	0.182719	0.243083	0.118499	0.294925	0.291758	0.350419	0.278866	0.300757	0.341649	0.303017	0.281104	0.422661	0.436197	0.412871	0.397909	0.148966	0.213163	0.0520236	0.228281	0.0755449	0.229328	NaN	NaN	0.0169763	0.22148	0.0556886	0.231151	NaN	NaN
P8LeftHemiOddRuns		NaN	NaN	NaN	NaN	0.273888	0.183801	0.243351	0.18602	0.246434	0.178943	0.302521	0.216133	0.287154	0.30955	0.317621	0.240397	0.416425	0.37605	0.41677	0.378483	0.240156	0.0300569	0.0565316	0.22255	0.0795213	0.209978	NaN	NaN	NaN	NaN	NaN	NaN	NaN	NaN
P8RightHemiEvenRuns		0.257513	0.0982248	0.236399	0.076228	0.233144	0.0689261	0.364565	0.252453	0.285557	0.0747597	0.388878	0.248214	0.296715	0.295048	0.324483	0.234516	0.267342	0.149991	0.20447	0.188287	0.185738	0.270899	0.262301	0.219676	0.0951672	0.261849	0.118889	0.257085	0.0982522	0.230443	0.161006	0.334963	NaN	NaN
P8RightHemiOddRuns		NaN	NaN	0.212254	0.0857004	0.238248	0	0.343794	0.181727	0.272307	0.0892367	0.345924	0.285417	0.312268	0.257416	0.333968	0.120589	0.257263	0.0957428	0.27504	0.0834482	0.262831	0.280111	0.333238	0.25914	0.199422	0.263778	0.218453	0.234957	0.159408	0.213154	0.211273	0.345278	NaN	NaN

## Sheet: eccVFM
	Visual Field Map, model and eccentricity	V1_near_mono	V1_far_mono	V1_near_tuned	V1_far_tuned	V1_near_diff	V1_far_diff	V2_near_mono	V2_far_mono	V2_near_tuned	V2_far_tuned	V2_near_diff	V2_far_diff	V3_near_mono	V3_far_mono	V3_near_tuned	V3_far_tuned	V3_near_diff	V3_far_diff	LO1_near_mono	LO1_far_mono	LO1_near_tuned	LO1_far_tuned	LO1_near_diff	LO1_far_diff	LO2_near_mono	LO2_far_mono	LO2_near_tuned	LO2_far_tuned	LO2_near_diff	LO2_far_diff	TO1_near_mono	TO1_far_mono	TO1_near_tuned	TO1_far_tuned	TO1_near_diff	TO1_far_diff	TO2_near_mono	TO2_far_mono	TO2_near_tuned	TO2_far_tuned	TO2_near_diff	TO2_far_diff	V3AB_near_mono	V3AB_far_mono	V3AB_near_tuned	V3AB_far_tuned	V3AB_near_diff	V3AB_far_diff
Measure
P1LeftHemiEvenRuns		0.0889122	0.0499467	0.0318647	0.00151921	-0.0570475	-0.0484275	0.0585841	0.105799	0.0183458	0.000836131	-0.0402383	-0.104963	0.156969	0.0996268	0.0720974	0.00781122	-0.0848712	-0.0918156	0.223756	0.0365281	0.0477106	0.00969133	-0.176046	-0.0268367	0.193696	0.0717671	0.0801971	0.0171392	-0.113498	-0.0546279	0.131829	0.226521	0.0580116	0.201609	-0.0738171	-0.024911	0.280546	0.385527	0.158705	0.237124	-0.121842	-0.148403	0.141836	0.051493	0.0560868	0.0242922	-0.0857496	-0.0272008
P1LeftHemiOddRuns		0.0627361	0.0540987	0.0117162	0.000947928	-0.0510199	-0.0531508	0.0595722	0.102921	0.0145596	0.0011398	-0.0450126	-0.101781	0.131459	0.0922662	0.0756222	0.00263817	-0.0558372	-0.089628	0.194951	0.0306512	0.0864293	0.0159296	-0.108522	-0.0147216	0.170675	0.056273	0.0339533	0.0200369	-0.136722	-0.0362361	0.0916377	0.200802	0.0389612	0.122768	-0.0526766	-0.0780339	0.277821	0.352609	0.250275	0.315556	-0.0275455	-0.037053	0.1155	0.0409562	0.100426	0.0271253	-0.0150739	-0.013831
P1RightHemiEvenRuns		0.20658	0.0463803	0.0436883	0.00144779	-0.162892	-0.0449325	0.219084	0.105948	0.06011	0.00245439	-0.158974	-0.103494	0.220992	0.0737127	0.0711814	0.00187914	-0.149811	-0.0718335	0.275957	0.103907	0.0972979	0.0226477	-0.178659	-0.0812594	0.364185	0.167858	0.146038	0.0807483	-0.218146	-0.0871093	0.496518	0.587988	0.367969	0.464382	-0.128548	-0.123607	0.320024	0.405522	0.210871	0.313929	-0.109153	-0.0915929	0.136513	0.0562023	0.0483462	0.0205823	-0.0881668	-0.0356199
P1RightHemiOddRuns		0.190508	0.0626671	0.0825021	0.00152955	-0.108006	-0.0611376	0.182338	0.114817	0.0742493	0.0037225	-0.108089	-0.111094	0.20077	0.0783397	0.109464	0.00203547	-0.0913057	-0.0763043	0.215396	0.0691732	0.106764	0.0143173	-0.108632	-0.054856	0.309738	0.111645	0.0800591	0.0327458	-0.229679	-0.0788989	0.420474	0.531342	0.391943	0.416532	-0.0285313	-0.11481	0.277512	0.370179	0.217008	0.295066	-0.0605041	-0.0751127	0.0904197	0.0499192	0.04582	0.0204958	-0.0445996	-0.0294235
P2LeftHemiEvenRuns		0.0224185	0.0314396	0.00208945	0.000820755	-0.0203291	-0.0306188	0.0341998	0.0500047	0.00337236	0.00125626	-0.0308274	-0.0487484	0.0369217	0.0629737	0.00915816	0.00594578	-0.0277636	-0.0570279	0.0946302	0.0197636	0.0231685	0.00109455	-0.0714617	-0.018669	0.0102038	0.0044207	8.82044e-05	0.000409063	-0.0101155	-0.00401163	0.156494	0.0399639	0.193078	0.0369029	0.0365837	-0.003061	0.155741	0.130396	0.209316	0.175026	0.0535747	0.0446306	0.112652	0.0591562	0.0510353	0.0267595	-0.0616163	-0.0323966
P2LeftHemiOddRuns		0.0145887	0.0416618	0.00185349	0.00213766	-0.0127352	-0.0395242	0.0278293	0.0512004	0.00349977	0.00291025	-0.0243296	-0.0482901	0.0319969	0.0620589	0.0146178	0.00741894	-0.0173791	-0.0546399	0.0846402	0.019169	0.0466522	0.00193321	-0.037988	-0.0172358	0.00456896	0.000786447	0.00101861	0	-0.00355034	-0.000786447	0.13856	0.0333356	0.119104	0.0370808	-0.0194555	0.00374521	0.154721	0.124612	0.153868	0.184	-0.000852741	0.0593875	0.103525	0.0522502	0.0858229	0.0400016	-0.0177022	-0.0122486
P2RightHemiEvenRuns		0.0541858	0.0265767	0.0402057	0.000666931	-0.0139801	-0.0259097	0.0914036	0.0450328	0.0922042	0.000725718	0.000800603	-0.0443071	0.123066	0.0551698	0.0427198	0.0127352	-0.0803461	-0.0424346	0.122123	0.0544931	0.0227742	0.000641046	-0.0993484	-0.0538521	0.0977938	0.0283088	0.0249703	0.00025087	-0.0728235	-0.0280579	0.235432	0.185693	0.303794	0.170691	0.0683613	-0.0150015	0.200053	0.126782	0.312077	0.201202	0.112024	0.0744193	0.12684	0.0617265	0.128032	0.0454981	0.00119193	-0.0162284
P2RightHemiOddRuns		0.0418985	0.031677	0.0140678	0.00107425	-0.0278307	-0.0306027	0.075487	0.0420192	0.069563	0.0039704	-0.00592402	-0.0380488	0.11332	0.0546595	0.0627401	0.0108162	-0.0505799	-0.0438433	0.111797	0.05829	0.0286135	0.00272828	-0.0831836	-0.0555617	0.0951719	0.0200848	0.0398883	0.00697745	-0.0552836	-0.0131073	0.209225	0.171357	0.23524	0.186601	0.026015	0.0152441	0.175136	0.107015	0.277994	0.148019	0.102857	0.041004	0.111459	0.0548859	0.119805	0.038301	0.00834569	-0.016585
P3LeftHemiEvenRuns		0.0412115	0.0325361	0.0101178	0.00230694	-0.0310937	-0.0302292	0.117671	0.0522513	0.0653749	0.00561227	-0.052296	-0.046639	0.203983	0.0489126	0.138303	0.0212266	-0.0656792	-0.0276861	0.126515	0.0316727	0.0714925	0.00721795	-0.0550229	-0.0244548	0.118679	0.0861444	0.0786021	0.0668151	-0.0400772	-0.0193292	0.111198	0.129893	0.0761251	0.145562	-0.0350728	0.0156685	0.157858	0.173934	0.221643	0.244733	0.063785	0.0707995	0.0485781	0.0453109	0.0991074	0.0180746	0.0505293	-0.0272362
P3LeftHemiOddRuns		0.0513437	0.0234281	0.00225935	0.00900452	-0.0490844	-0.0144236	0.147182	0.0587463	0.0597969	0.010314	-0.0873852	-0.0484324	0.228154	0.0413428	0.123767	0.0249256	-0.104387	-0.0164171	0.144823	0.0308798	0.0377127	0.00890325	-0.10711	-0.0219765	0.13375	0.0912054	0.0592753	0.0667577	-0.0744752	-0.0244477	0.12973	0.1465	0.0538315	0.0800455	-0.0758989	-0.0664546	0.159861	0.1713	0.17428	0.195372	0.0144184	0.024072	0.0542561	0.0421817	0.0873239	0.0145082	0.0330678	-0.0276735
P3RightHemiEvenRuns		0.0246525	0.0378596	0.0100383	0.00176851	-0.0146142	-0.0360911	0.0434843	0.0679399	0.0260054	0.00330387	-0.0174789	-0.064636	0.090812	0.0637038	0.0534156	0.00518345	-0.0373964	-0.0585203	0.117778	0.0515674	0.0548647	0.0185754	-0.0629136	-0.032992	0.119752	0.061563	0.0294012	0.020927	-0.0903504	-0.0406361	0.0765591	0.0504345	0.0361379	0.0153863	-0.0404211	-0.0350482	0.0765951	0.144358	0.0552466	0.141633	-0.0213485	-0.00272541	0.0375621	0.0561326	0.0123149	0.00296099	-0.0252472	-0.0531716
P3RightHemiOddRuns		0.0313983	0.0278335	0.0059071	0.00918857	-0.0254912	-0.0186449	0.0634694	0.070879	0.0143514	0.0106653	-0.0491179	-0.0602137	0.0973304	0.0671669	0.0385789	0.0096185	-0.0587515	-0.0575484	0.116962	0.0609966	0.0499351	0.0197612	-0.0670271	-0.0412354	0.134334	0.0741865	0.0233372	0.00603406	-0.110997	-0.0681524	0.0937173	0.0722808	0.0214188	0.0116596	-0.0722985	-0.0606212	0.0795043	0.14996	0.0579978	0.135525	-0.0215064	-0.0144351	0.0400807	0.0597497	0.0195957	0.00830502	-0.0204849	-0.0514447
P4LeftHemiEvenRuns		0.0679431	0.0205574	0.0272041	0.00167255	-0.040739	-0.0188848	0.106051	0.0254576	0.0347946	0.00516271	-0.0712567	-0.0202949	0.167425	0.0233991	0.0656796	0.00565576	-0.101745	-0.0177434	0.202853	0.0494814	0.0784043	0.020572	-0.124448	-0.0289094	0.267127	0.282135	0.129386	0.233797	-0.137741	-0.0483384	0.235341	0.095367	0.160953	0.103006	-0.0743878	0.00763876	0.177699	0.146604	0.163782	0.108364	-0.0139175	-0.03824	0.103029	0.0346217	0.059943	0.0215386	-0.0430858	-0.0130831
P4LeftHemiOddRuns		0.0755606	0.0209463	0.0300318	0.000910002	-0.0455289	-0.0200363	0.110807	0.0346437	0.0244989	0.00361103	-0.0863083	-0.0310327	0.174336	0.0252391	0.047876	0.00262205	-0.12646	-0.022617	0.206013	0.0570013	0.0894968	0.0129805	-0.116517	-0.0440208	0.272228	0.299953	0.160879	0.275039	-0.111349	-0.0249144	0.277718	0.144563	0.177231	0.108072	-0.100487	-0.0364911	0.208712	0.172467	0.0716241	0.0746218	-0.137088	-0.0978451	0.0970585	0.0366825	0.0463967	0.0197325	-0.0506617	-0.01695
P4RightHemiEvenRuns		0.0841567	0.0176073	0.0204166	0.00137391	-0.0637401	-0.0162334	0.0832147	0.0278956	0.0207848	0.00169675	-0.06243	-0.0261989	0.166877	0.0190082	0.0620519	0.0020268	-0.104825	-0.0169814	0.138569	0.0160194	0.0274448	0.00787474	-0.111125	-0.00814471	0.258084	0.190644	0.149386	0.161427	-0.108698	-0.0292175	0.327275	0.155212	0.224309	0.118218	-0.102966	-0.036994	0.274204	0.205965	0.266578	0.160658	-0.0076252	-0.0453062	0.0147367	0.0509893	0.00495117	0.0335232	-0.00978549	-0.017466
P4RightHemiOddRuns		0.0805537	0.0188835	0.0207793	0.00162798	-0.0597744	-0.0172555	0.0874532	0.040174	0.0300284	0.00256529	-0.0574248	-0.0376087	0.175904	0.0284096	0.075978	0.0017876	-0.0999258	-0.026622	0.152706	0.0270148	0.0482842	0.0140322	-0.104422	-0.0129827	0.258376	0.205101	0.146718	0.117043	-0.111658	-0.0880573	0.337226	0.189806	0.189494	0.106592	-0.147731	-0.0832145	0.303031	0.25326	0.266575	0.206844	-0.0364565	-0.0464161	0.0269422	0.0542795	0.00248633	0.032055	-0.0244558	-0.0222245
P5LeftHemiEvenRuns		0.0680165	0.0585754	0.00123742	0.00124098	-0.0667791	-0.0573344	0.0642996	0.0571806	0.00489034	0.00440218	-0.0594092	-0.0527785	0.121116	0.05017	0.0406953	0.0108723	-0.0804205	-0.0392977	0.12213	0.0313	0.0679525	0.0174564	-0.054177	-0.0138436	0.0906385	0.132215	0.0400183	0.0319549	-0.0506203	-0.10026	0.211233	0.142853	0.190349	0.1183	-0.020884	-0.0245532	0.12846	0.153339	0.0833797	0.144491	-0.0450804	-0.00884743	0.0379606	0.0598509	0.0367121	0.071737	-0.00124851	0.0118861
P5LeftHemiOddRuns		0.0604137	0.0287489	0.00682394	0.00193007	-0.0535897	-0.0268189	0.0601704	0.0361503	0.0128563	0.0137081	-0.0473141	-0.0224422	0.103148	0.0360055	0.0647217	0.0229077	-0.0384265	-0.0130978	0.121027	0.0247568	0.085478	0.0216168	-0.0355494	-0.00314	0.0938897	0.118982	0.0552697	0.034259	-0.03862	-0.0847229	0.216361	0.14484	0.203136	0.1303	-0.0132255	-0.0145399	0.110216	0.152222	0.0642659	0.161481	-0.04595	0.00925909	0.0345478	0.0565699	0.0346684	0.0700951	0.000120548	0.0135252
P5RightHemiEvenRuns		0.0653821	0.0799447	0.00258123	0.000237126	-0.0628008	-0.0797076	0.10655	0.0842584	0.00460204	0.00223527	-0.101948	-0.0820231	0.109719	0.0803682	0.0228856	0.0142422	-0.0868337	-0.066126	0.179817	0.0978746	0.0587601	0.00725055	-0.121057	-0.090624	0.195549	0.119777	0.145844	0.0439871	-0.0497045	-0.0757895	0.2426	0.278654	0.157398	0.237122	-0.085202	-0.0415323	0.0988046	0.203242	0.0780977	0.191926	-0.0207069	-0.0113159	0.0745856	0.0402884	0.0379214	0.0171182	-0.0366642	-0.0231702
P5RightHemiOddRuns		0.0479388	0.0428455	0.00342683	0.0010739	-0.044512	-0.0417716	0.0901489	0.0686086	0.0105796	0.00378237	-0.0795693	-0.0648263	0.0903886	0.0551988	0.0247669	0.0154951	-0.0656217	-0.0397038	0.157966	0.0805627	0.0451099	0.0128834	-0.112856	-0.0676793	0.217554	0.0991017	0.0242324	0.0370559	-0.193321	-0.0620458	0.292353	0.28825	0.172538	0.245275	-0.119815	-0.0429746	0.0861833	0.170383	0.00271526	0.18574	-0.083468	0.0153577	0.0672037	0.0329569	0.040611	0.0165785	-0.0265927	-0.0163783
P6LeftHemiEvenRuns		0.0350302	0.0123602	0.00890336	0.00405664	-0.0261269	-0.0083036	0.0772266	0.0232953	0.00939376	0.00827079	-0.0678329	-0.0150245	0.0402565	0.0260539	0.00999853	0.00901652	-0.030258	-0.0170374	0.116201	0.00222821	0.0296503	0.00917553	-0.0865507	0.00694732	0.0633009	0.0157379	0.00781291	0.0077753	-0.0554879	-0.00796256	0.213945	0.260606	0.0764779	0.147131	-0.137468	-0.113475	0.123082	0.285727	0.0872016	0.307812	-0.0358809	0.0220848	0.0363897	0.0354848	0.00401592	0.0156377	-0.0323738	-0.019847
P6LeftHemiOddRuns		0.0389217	0.013175	0.00620163	0.00422011	-0.0327201	-0.00895487	0.0872141	0.0319617	0.00616487	0.00892423	-0.0810492	-0.0230375	0.0435225	0.0399886	0.0124335	0.0120941	-0.031089	-0.0278945	0.140168	0.00518413	0.0506631	0.00904011	-0.0895048	0.00385597	0.0734884	0.020072	0.0183655	0.017232	-0.0551229	-0.00284002	0.238362	0.294868	0.106997	0.267966	-0.131365	-0.0269015	0.13658	0.325965	0.107824	0.35417	-0.0287554	0.0282048	0.0388618	0.0485252	0.0139378	0.0229141	-0.024924	-0.0256111
P6RightHemiEvenRuns		0.0582219	0.011114	0.0128279	0.00505759	-0.045394	-0.00605644	0.0568909	0.0441396	0.0232166	0.00941966	-0.0336744	-0.03472	0.101539	0.036942	0.0101472	0.0103572	-0.0913916	-0.0265848	0.168782	0.0274609	0.0146359	0.00993442	-0.154146	-0.0175265	0.142435	0.084379	0.0270086	0.0112929	-0.115426	-0.0730862	0.179727	0.12021	0.0592645	0.0276976	-0.120462	-0.0925124	0.108015	0.274237	0.0842784	0.154672	-0.0237364	-0.119566	0.0588663	0.0147785	0.0117534	0.0118519	-0.0471129	-0.00292657
P6RightHemiOddRuns		0.072138	0.0120004	0.0251925	0.00459631	-0.0469455	-0.00740406	0.0848614	0.0502234	0.0474096	0.0199615	-0.0374518	-0.0302619	0.138741	0.0380015	0.0401721	0.0238475	-0.0985692	-0.0141539	0.217311	0.0383447	0.0307881	0.0139077	-0.186523	-0.024437	0.162673	0.110242	0.0479665	0.0140712	-0.114706	-0.0961711	0.210966	0.13787	0.0784874	0.0462659	-0.132479	-0.0916036	0.153037	0.303922	0.138733	0.24195	-0.0143037	-0.0619722	0.0822016	0.0259936	0.0354972	0.0212492	-0.0467044	-0.00474441
P7LeftHemiEvenRuns		0.0158352	0.0337197	0.00460814	0.0036535	-0.0112271	-0.0300662	0.034456	0.00768368	0.0140039	0.00408063	-0.0204521	-0.00360305	0.0689685	0.0110732	0.0428388	0.00556592	-0.0261297	-0.00550728	0.109767	0.0264328	0.0357807	0.00535115	-0.0739861	-0.0210816	0.0571941	0.0487273	0.03242	0.0096057	-0.0247742	-0.0391216	0.0593328	0.0833341	0.00825505	0.021417	-0.0510778	-0.0619171	0.228456	0.168966	0.0735268	0.0665421	-0.154929	-0.102424	0.146439	0.0460206	0.0751755	0.01004	-0.0712634	-0.0359806
P7LeftHemiOddRuns		0.0134507	0.0271856	0.00560729	0.00208404	-0.00784338	-0.0251015	0.0200345	0.0121576	0.00822465	0.00227959	-0.0118098	-0.00987802	0.0565895	0.0188356	0.0321422	0.00674627	-0.0244473	-0.0120894	0.083159	0.028826	0.0405132	0.00827055	-0.0426458	-0.0205555	0.0492359	0.0371516	0.0253166	0.0126969	-0.0239193	-0.0244547	0.0429924	0.0486634	0.0219139	0.0208889	-0.0210784	-0.0277744	0.211336	0.139868	0.194308	0.11093	-0.0170283	-0.0289387	0.1156	0.0342353	0.0969625	0.0148963	-0.0186372	-0.019339
P7RightHemiEvenRuns		0.00674032	0.0234076	0.00374525	0.0026406	-0.00299507	-0.020767	0.0362765	0.0113374	0.00726133	0.00313164	-0.0290152	-0.00820571	0.0862463	0.0244513	0.0350208	0.00995632	-0.0512256	-0.014495	0.3025	0.162594	0.182188	0.0406919	-0.120312	-0.121902	0.156373	0.0508727	0.0896881	0.0115403	-0.0666849	-0.0393324	0.30166	0.327535	0.11659	0.13498	-0.185071	-0.192555	0.263967	0.18464	0.197322	0.106341	-0.0666451	-0.0782991	0.0763888	0.0797315	0.0131989	0.0202818	-0.0631899	-0.0594497
P7RightHemiOddRuns		0.0120513	0.0281273	0.00517081	0.00107927	-0.00688051	-0.027048	0.0248825	0.0123485	0.00591514	0.00363895	-0.0189674	-0.00870955	0.0652584	0.0236319	0.0332099	0.00963721	-0.0320485	-0.0139947	0.273083	0.130477	0.225203	0.0806137	-0.0478805	-0.0498629	0.151638	0.0528918	0.0835044	0.0245891	-0.0681337	-0.0283027	0.225448	0.270463	0.181071	0.250948	-0.0443772	-0.0195158	0.191637	0.184997	0.190336	0.16081	-0.00130071	-0.024187	0.0508277	0.0527488	0.0295957	0.0280608	-0.021232	-0.024688
P8LeftHemiEvenRuns		0.0178912	0.0112905	0.00521765	0.00192845	-0.0126736	-0.00936208	0.0380893	0.0285121	0.0140949	0.00264086	-0.0239944	-0.0258712	0.114509	0.0328196	0.0715848	0.0057094	-0.0429243	-0.0271102	0.0838146	0.014512	0.0490995	0.00514747	-0.0347151	-0.00936456	0.0411942	0.042892	0.0204872	0.0316358	-0.020707	-0.0112563	0.318406	0.179545	0.291247	0.110408	-0.0271593	-0.0691369	0.0710996	0.158393	0.0691537	0.169189	-0.00194584	0.010796	0.0593879	0.010913	0.0428541	0.00361094	-0.0165339	-0.0073021
P8LeftHemiOddRuns		0.0105216	0.0114655	0.00445803	0.00252004	-0.00606356	-0.00894551	0.0302315	0.0215463	0.0138863	0.00226015	-0.0163452	-0.0192862	0.102719	0.03424	0.0671777	0.00467514	-0.035541	-0.0295648	0.0709838	0.0103995	0.0494244	0.00525688	-0.0215594	-0.00514262	0.0326732	0.0239954	0.0178289	0.0172622	-0.0148443	-0.00673319	0.168749	0.112253	0.139154	0.0779202	-0.0295952	-0.0343332	0.076108	0.113571	0.0514647	0.112623	-0.0246433	-0.000948489	0.0812284	0.0173693	0.040879	0.00439232	-0.0403494	-0.012977
P8RightHemiEvenRuns		0.0314121	0.0212073	0.00435624	0.000669055	-0.0270559	-0.0205382	0.089113	0.0617952	0.0363383	0.00309341	-0.0527747	-0.0587018	0.0590218	0.0742437	0.0261164	0.00142984	-0.0329054	-0.0728139	0.129003	0.0198188	0.0706658	0.00523934	-0.0583376	-0.0145795	0.0768235	0.0221635	0.0205445	0.000695903	-0.056279	-0.0214676	0.288229	0.178842	0.175037	0.107989	-0.113192	-0.0708533	0.103513	0.148601	0.100307	0.126952	-0.00320562	-0.0216492	0.113579	0.0220902	0.0762846	0.0116339	-0.0372944	-0.0104563
P8RightHemiOddRuns		0.0148376	0.0199765	0.00502826	0.00178117	-0.0098093	-0.0181954	0.04625	0.0450139	0.0371695	0.00095275	-0.00908044	-0.0440611	0.0211024	0.0530387	0.0137847	0.000901383	-0.0073177	-0.0521373	0.100202	0.0177289	0.0479072	0.00174916	-0.0522946	-0.0159797	0.0428039	0.00906212	0.0190288	0.00147454	-0.0237751	-0.00758758	0.236737	0.116122	0.200237	0.0759527	-0.0364997	-0.040169	0.125037	0.145686	0.0794125	0.107559	-0.0456241	-0.0381265	0.103836	0.0184467	0.0364683	0.00768564	-0.0673679	-0.0107611
[truncated: 54 more columns]

## Sheet: modTM
	Timing Map and Model	TLOmono	TLOtuned	TTOPmono	TTOPtuned	TTOAmono	TTOAtuned	TPOmono	TPOtuned	TLSmono	TLStuned	TPCImono	TPCItuned	TPCMmono	TPCMtuned	TPCSmono	TPCStuned	TFImono	TFItuned	TFSmono	TFStuned
Measure
P1LeftHemiEvenRuns		0.34471	0.0968337	0.506615	0.390351	0.369239	0.288962	0.307529	0.273073	0.362759	0.331115	0.225246	0.262479	0.266336	0.341908	0.161682	0.358644	0.191619	0.299945	0.22176	0.402049
P1LeftHemiOddRuns		0.352874	0.136762	0.491216	0.441395	0.368424	0.375895	0.321633	0.364203	0.355154	0.414761	0.194964	0.314618	0.258784	0.382304	0.149886	0.358679	0.214673	0.338368	0.231165	0.407481
P1RightHemiEvenRuns		0.381981	0.101937	0.539498	0.443014	0.407557	0.314483	0.347452	0.293749	0.389247	0.396581	0.254921	0.253506	0.200816	0.331292	0.152605	0.321792	0.209934	0.203464	0.21686	0.332227
P1RightHemiOddRuns		0.352428	0.141766	0.500303	0.4348	0.392823	0.317389	0.337011	0.300852	0.380303	0.437938	0.265517	0.281305	0.176198	0.335807	0.149952	0.338944	0.246651	0.274249	0.215098	0.351126
P2LeftHemiEvenRuns		0.226703	0.214491	0.306938	0.438468	0.264326	0.380427	0.169348	0.460548	NaN	NaN	0.0912605	0.349645	0.140896	0.391057	0.130448	0.464574	0.113304	0.327256	0.126506	0.494773
P2LeftHemiOddRuns		0.232765	0.266052	0.291192	0.354477	0.257448	0.427741	0.158464	0.367172	NaN	NaN	0.0899235	0.339867	0.13946	0.376804	0.107741	0.411699	0.123843	0.31729	0.106961	0.445237
P2RightHemiEvenRuns		0.317904	0.372857	0.304853	0.430758	0.299555	0.42585	0.150272	0.350634	0.188642	0.4039	NaN	NaN	0.106842	0.37584	0.138988	0.384433	0.140604	0.300878	0.0831003	0.349987
P2RightHemiOddRuns		0.318968	0.386539	0.291025	0.430515	0.281147	0.409808	0.13367	0.324229	0.161547	0.396356	NaN	NaN	0.096441	0.388952	0.106875	0.346151	0.131012	0.315533	0.0784815	0.328173
P3LeftHemiEvenRuns		0.2711	0.272167	0.341416	0.504351	0.278626	0.522543	0.151285	0.399569	0.134239	0.470458	0.0857137	0.394726	0.119622	0.459195	0.0667429	0.422294	0.105227	0.295127	0.094588	0.467809
P3LeftHemiOddRuns		0.284314	0.229742	0.33665	0.319258	0.274243	0.410884	0.141358	0.378871	0.145236	0.441541	0.0856357	0.429125	0.111784	0.455628	0.068018	0.429768	0.0986143	0.337017	0.0871403	0.462662
P3RightHemiEvenRuns		0.270429	0.202585	0.321639	0.296843	0.297619	0.341691	0.205196	0.23095	0.126164	0.276256	0.0934598	0.340393	0.112611	0.362625	0.0505154	0.382021	0.129368	0.107426	0.114022	0.400716
P3RightHemiOddRuns		0.273743	0.190436	0.291809	0.185872	0.307712	0.339557	0.176476	0.277119	0.10748	0.242313	0.0866611	0.348474	0.10991	0.341127	0.0462103	0.373193	0.235278	0.119382	0.0998751	0.379495
P4LeftHemiEvenRuns		0.338375	0.187513	0.390816	0.207103	0.360576	0.290136	0.364467	0.368295	0.304118	0.201729	0.282505	0.328323	0.328179	0.37983	0.190121	0.359026	0.274794	0.311239	0.232199	0.407254
P4LeftHemiOddRuns		0.341066	0.173034	0.386223	0.229931	0.341426	0.173279	0.330801	0.295491	0.330881	0.144522	0.282455	0.289493	0.305161	0.338861	0.17223	0.354341	0.254842	0.293733	0.19081	0.369108
P4RightHemiEvenRuns		0.28243	0.156134	0.399227	0.30234	0.371602	0.333017	0.274513	0.197423	0.293813	0.317296	0.241734	0.160036	0.268591	0.282798	0.118892	0.335397	0.100814	0.253081	0.126821	0.322517
P4RightHemiOddRuns		0.283011	0.169373	0.400536	0.279666	0.381089	0.291268	0.264099	0.169548	0.307883	0.31689	0.228064	0.0756794	0.250451	0.268611	0.098178	0.313912	0.135091	0.280661	0.09382	0.315326
P5LeftHemiEvenRuns		0.307839	0.17463	0.335306	0.324732	0.228839	0.209922	0.241497	0.371554	0.309839	0.463871	0.189598	0.345409	0.227058	0.415455	0.11147	0.375603	0.206298	0.388473	0.151462	0.381806
P5LeftHemiOddRuns		0.311971	0.263118	0.34638	0.349491	0.215409	0.221787	0.300331	0.404153	0.303985	0.458459	0.183036	0.337028	0.22782	0.396844	0.0989853	0.353476	0.211531	0.388223	0.136446	0.376871
P5RightHemiEvenRuns		0.290988	0.195581	0.395641	0.33567	0.391334	0.391971	0.290359	0.209133	0.180216	0.336371	NaN	NaN	0.18718	0.297363	0.0772031	0.278401	NaN	NaN	0.133696	0.273271
P5RightHemiOddRuns		0.282296	0.138794	0.386867	0.325464	0.390786	0.400945	0.343948	0.302713	0.159987	0.307754	NaN	NaN	0.190679	0.275731	0.0676623	0.259744	NaN	NaN	0.0980899	0.267634
P6LeftHemiEvenRuns		0.28764	0.129617	0.399099	0.220262	0.421273	0.445312	0.308156	0.191835	0.310463	0.375285	0.149468	0.221606	0.316914	0.484079	0.169842	0.321502	0.0846412	0.306857	0.109208	0.296569
P6LeftHemiOddRuns		0.295937	0.145463	0.416024	0.303793	0.442347	0.465573	0.320047	0.249876	0.344827	0.395381	0.120128	0.228498	0.331129	0.482016	0.173102	0.319318	0.0985657	0.294809	0.0984273	0.293932
P6RightHemiEvenRuns		0.286508	0.146622	0.426395	0.241938	0.360441	0.347399	0.266885	0.237653	0.277388	0.321802	0.165576	0.236908	0.294774	0.302671	0.175518	0.281988	0.213267	0.209249	0.129235	0.287782
P6RightHemiOddRuns		0.314343	0.233342	0.435112	0.364811	0.384549	0.383523	0.265095	0.166278	0.322469	0.287706	0.202479	0.184797	0.310637	0.339066	0.133321	0.276767	0.180677	0.204768	0.129918	0.27787
P7LeftHemiEvenRuns		0.296495	0.142555	0.358904	0.149752	0.27827	0.156864	0.31758	0.261306	0.251377	0.186923	0.17313	0.259135	0.234618	0.240711	0.169854	0.327237	0.224857	0.183524	0.194865	0.281729
P7LeftHemiOddRuns		0.270212	0.225053	0.361254	0.339919	0.250838	0.263229	0.310325	0.356611	0.217853	0.272859	0.168421	0.247092	0.201826	0.337015	0.142445	0.309602	0.205687	0.288082	0.158587	0.263937
P7RightHemiEvenRuns		0.316505	0.172624	0.33234	0.18759	0.239319	0.0792819	0.26944	0.113586	0.273869	0.253738	0.121387	0.232917	0.184988	0.243927	0.174906	0.240295	0.236944	0.24228	0.197161	0.309297
P7RightHemiOddRuns		0.309377	0.240772	0.321027	0.309864	0.246513	0.218961	0.263092	0.20659	0.285735	0.341073	0.165099	0.231	0.196832	0.277861	0.148404	0.26774	0.254923	0.276384	0.164064	0.271127
P8LeftHemiEvenRuns		0.27706	0.191802	0.35087	0.301609	0.333027	0.301008	0.415009	0.41861	0.209032	0.183323	NaN	NaN	NaN	NaN	0.0711001	0.229121	NaN	NaN	0.0198753	0.227138
P8LeftHemiOddRuns		0.286354	0.219922	0.31653	0.210256	0.275946	0.254476	0.410031	0.366325	0.265124	0.228537	NaN	NaN	NaN	NaN	0.0749234	0.212492	NaN	NaN	NaN	NaN
P8RightHemiEvenRuns		0.329141	0.21617	0.355083	0.274146	0.273314	0.276393	0.241666	0.232933	0.234337	0.289008	0.112347	0.232297	0.13472	0.258656	0.0816359	0.262258	NaN	NaN	0.0995405	0.23631
P8RightHemiOddRuns		0.332424	0.167147	0.341929	0.271916	0.279511	0.23728	0.315657	0.279613	0.265763	0.274867	0.197006	0.222617	0.236982	0.255255	0.170103	0.245035	NaN	NaN	0.159408	0.213154

## Sheet: eccBins
data	bin_center	BothV1mono	BothV1tuned	BothV1diff	BothV2mono	BothV2tuned	BothV2diff	BothV3mono	BothV3tuned	BothV3diff	BothLO1mono	BothLO1tuned	BothLO1diff	BothLO2mono	BothLO2tuned	BothLO2diff	BothTO1mono	BothTO1tuned	BothTO1diff	BothTO2mono	BothTO2tuned	BothTO2diff	BothV3ABmono	BothV3ABtuned	BothV3ABdiff	BothIPS0mono	BothIPS0tuned	BothIPS0diff	BothIPS1mono	BothIPS1tuned	BothIPS1diff	BothIPS2mono	BothIPS2tuned	BothIPS2diff	BothIPS3mono	BothIPS3tuned	BothIPS3diff	BothIPS4mono	BothIPS4tuned	BothIPS4diff	BothIPS5mono	BothIPS5tuned	BothIPS5diff	BothsPCS1mono	BothsPCS1tuned	BothsPCS1diff	BothsPCS2mono	BothsPCS2tuned	BothsPCS2diff
mean	0.1	0.174648	0.0552703	-0.119378	0.121095	0.0206586	-0.100436	0.163623	0.0609991	-0.102624	0.232953	0.07541	-0.157543	0.277569	0.101118	-0.176452	0.204165	0.114798	-0.0893672	0.171802	0.153036	-0.0187658	0.139368	0.0770359	-0.0623324	0.186901	0.147182	-0.0397194	0.0690753	0.114542	0.0454669	0.090943	0.172919	0.0819762	0.103308	0.219754	0.116446	0.099845	0.120541	0.0206956	0.101447	0.118338	0.0168916	0.0609597	0.237318	0.176358	0.0813022	0.134942	0.0536402
mean	0.3	0.135297	0.0461389	-0.0891577	0.147747	0.0435949	-0.104152	0.181676	0.0624615	-0.119214	0.20669	0.0645011	-0.142188	0.25471	0.0997447	-0.154965	0.358072	0.238472	-0.1196	0.242494	0.211977	-0.0305167	0.133244	0.0800471	-0.0531971	0.165994	0.137091	-0.0289033	0.090933	0.107118	0.0161847	0.0911365	0.145919	0.0547826	0.0904824	0.19131	0.100827	0.130522	0.168141	0.0376182	0.137603	0.231423	0.0938192	0.0510108	0.215269	0.164258	0.082011	0.179682	0.0976706
mean	0.5	0.0720494	0.0169608	-0.0550886	0.0963617	0.026799	-0.0695627	0.112405	0.0409761	-0.0714293	0.137047	0.0555241	-0.0815231	0.158924	0.0741595	-0.0847644	0.194779	0.134854	-0.0599246	0.161124	0.142455	-0.0186689	0.0796664	0.0528871	-0.0267794	0.0965037	0.0705313	-0.0259724	0.058511	0.0753192	0.0168082	0.0552258	0.0875137	0.0322879	0.0640401	0.137641	0.0736012	0.0668603	0.0850963	0.018236	0.083821	0.111245	0.0274237	0.0369942	0.0872545	0.0502603	0.0626409	0.0993973	0.0367565
mean	0.7	0.103175	0.0378487	-0.0653265	0.102077	0.0478995	-0.0541778	0.142982	0.0722433	-0.0707389	0.133933	0.0612023	-0.0727304	0.158102	0.0845614	-0.0735402	0.351803	0.33579	-0.0160126	Nan	Nan	Nan	0.142907	0.144055	0.00114855	0.229761	0.174773	-0.0549879	0.0675949	0.0829556	0.0153607	0.0870152	0.162967	0.0759514	0.104062	0.177641	0.0735782	0.113085	0.122234	0.0091495	0.240805	0.292151	0.0513458	0.0556775	0.133525	0.0778475	0.12624	0.238439	0.1122
mean	0.9	0.0539832	0.0165412	-0.0374421	0.0677574	0.0289591	-0.0387983	0.0914779	0.0523008	-0.0391771	0.104241	0.0523359	-0.051905	0.111503	0.0564659	-0.0550376	0.172169	0.12087	-0.0512996	0.172079	0.17024	-0.00183874	0.0744039	0.0478237	-0.0265802	0.118577	0.0988741	-0.0197026	0.0612183	0.0806739	0.0194556	0.0467651	0.0767261	0.029961	0.0614818	0.117656	0.0561741	0.0699541	0.0904586	0.0205045	0.076221	0.102225	0.0260045	0.0302889	0.0617749	0.031486	0.0705519	0.111159	0.0406075
mean	1.1	0.0515235	0.021518	-0.0300055	0.0643144	0.0249621	-0.0393523	0.0967055	0.0591183	-0.0375872	0.104779	0.0595742	-0.0452045	0.145962	0.11074	-0.0352224	NaN	NaN	NaN	NaN	NaN	NaN	0.106224	0.0834163	-0.022808	NaN	NaN	NaN	NaN	NaN	NaN	NaN	NaN	NaN	NaN	NaN	NaN	NaN	NaN	NaN	NaN	NaN	NaN	NaN	NaN	NaN	NaN	NaN	NaN
mean	1.3	0.0388831	0.0110902	-0.0277929	0.0494079	0.0146432	-0.0347647	0.0706842	0.0384909	-0.0321932	0.0756195	0.0353921	-0.0402274	0.115267	0.0512606	-0.0640064	0.188167	0.127756	-0.0604103	0.194291	0.175664	-0.0186268	0.0612455	0.035255	-0.0259905	0.123802	0.112729	-0.0110728	0.0577077	0.0815769	0.0238692	0.0500516	0.0959175	0.0458659	0.0581084	0.12839	0.0702812	0.0703463	0.0918799	0.0215336	0.0920874	0.131261	0.0391735	0.035522	0.0717269	0.0362049	0.0742307	0.123845	0.0496141
mean	1.5	0.0323376	0.00658077	-0.0257568	0.0517576	0.010726	-0.0410315	0.0644251	0.0264339	-0.0379912	0.0800022	0.0308738	-0.0491284	0.0882751	0.041441	-0.046834	0.191385	0.126582	-0.0648033	0.158395	0.15192	-0.00647547	0.0724269	0.04503	-0.0273969	0.116802	0.105913	-0.0108891	0.0633108	0.10394	0.0406292	0.047914	0.0938002	0.0458862	0.0646764	0.115247	0.0505707	0.0877102	0.128469	0.0407589	0.0861898	0.109007	0.0228177	0.0328146	0.0707433	0.0379286	0.0768186	0.12288	0.0460618
mean	1.7	0.0340789	0.00394415	-0.0301347	0.050226	0.00647141	-0.0437546	0.0507058	0.0166031	-0.0341027	0.0645931	0.0239122	-0.0406809	0.0973576	0.0445696	-0.0527881	0.214849	0.161242	-0.0536078	0.173319	0.15543	-0.0178888	0.0617549	0.0334847	-0.0282702	0.128192	0.104993	-0.0231991	0.0525156	0.0775087	0.0249931	0.044606	0.0825529	0.0379469	0.0576577	0.127834	0.070176	0.0815201	0.107158	0.0256374	0.0791427	0.116675	0.0375327	0.0366787	0.0901288	0.0534501	0.0658482	0.141706	0.0758581
mean	1.9	0.0387664	0.00329888	-0.0354675	0.0635975	0.0092046	-0.0543929	0.0549544	0.0122166	-0.0427378	0.0517186	0.0179339	-0.0337847	0.114332	0.0654175	-0.0489149	0.231762	0.175398	-0.0563642	0.228536	0.159058	-0.0694778	0.0717843	0.0510316	-0.0207527	0.0966652	0.0915722	-0.00509297	0.053131	0.083242	0.030111	0.0394883	0.077976	0.0384877	0.0400389	0.0957892	0.0557503	0.0724708	0.116774	0.0443036	0.0819554	0.138814	0.0568586	0.0341086	0.0865678	0.0524592	0.0586355	0.0806614	0.0220259
mean	2.1	0.0387255	0.00307181	-0.0356536	0.0538074	0.0076825	-0.0461249	0.0519281	0.0140094	-0.0379187	0.0804099	0.0271942	-0.0532157	0.0834343	0.0304889	-0.0529454	0.184512	0.144798	-0.0397143	0.205446	0.174666	-0.0307805	0.054632	0.0313924	-0.0232397	0.111202	0.0983237	-0.0128788	0.0499028	0.0706701	0.0207673	0.043024	0.0754178	0.0323938	0.0486549	0.10552	0.0568652	0.0848379	0.118302	0.0334646	0.081118	0.137292	0.0561745	0.045117	0.111522	0.0664053	0.066609	0.121615	0.0550063
mean	2.3	0.0341426	0.00262241	-0.0315201	0.0598263	0.00583762	-0.0539887	0.058334	0.0087777	-0.0495563	0.0651494	0.00997713	-0.0551723	0.0765834	0.0295399	-0.0470435	0.191414	0.144187	-0.0472275	0.170841	0.125122	-0.0457195	0.059727	0.0399012	-0.0198258	0.120005	0.107232	-0.0127733	0.0504011	0.0744338	0.0240326	0.0368982	0.0472388	0.0103406	0.0572271	0.116202	0.0589747	0.0744923	0.110746	0.0362536	0.0933516	0.114277	0.0209249	0.0474491	0.111865	0.0644156	0.0343335	0.069827	0.0354935
mean	2.5	0.0321654	0.00273389	-0.0294315	0.0559642	0.00637656	-0.0495876	0.056643	0.0110715	-0.0455715	0.0541052	0.0106207	-0.0434845	0.110116	0.0620968	-0.0480193	0.194957	0.159638	-0.0353185	0.21873	0.214157	-0.00457303	0.0402514	0.0220674	-0.018184	0.0884484	0.0834412	-0.00500726	0.0651296	0.0888696	0.02374	0.044179	0.0792306	0.0350517	0.0453238	0.109082	0.0637578	0.0726141	0.0931271	0.020513	0.0909291	0.137475	0.0465454	0.0359192	0.0703251	0.0344059	0.0531522	0.104321	0.0511688
mean	2.7	0.0285952	0.00191832	-0.0266769	0.0530737	0.00370999	-0.0493637	0.05063	0.00920091	-0.0414291	0.0393572	0.0199954	-0.0193618	0.0818001	0.0448104	-0.0369897	0.242077	0.165318	-0.0767591	0.263478	0.273616	0.0101382	0.0531782	0.0285598	-0.0246184	0.0956981	0.0804575	-0.0152406	0.0567761	0.0772146	0.0204385	0.0411043	0.0720165	0.0309122	0.0522732	0.1328	0.0805264	0.0754854	0.110716	0.035231	0.0739176	0.11115	0.037232	0.0387318	0.0989546	0.0602228	0.052966	0.0902786	0.0373126
mean	2.9	0.0308217	0.00253356	-0.0282882	0.0481666	0.00403559	-0.044131	0.0528972	0.00721333	-0.0456838	0.0393227	0.0122477	-0.027075	0.0925256	0.0447634	-0.0477622	0.201219	0.17345	-0.0277688	0.210417	0.181875	-0.0285413	0.0435441	0.0228633	-0.0206808	0.0812141	0.0687103	-0.0125038	0.053572	0.0875674	0.0339955	0.0366909	0.0715842	0.0348932	0.0444133	0.127875	0.0834617	0.064322	0.0821039	0.017782	0.0917808	0.141917	0.0501367	0.0383781	0.0980265	0.0596484	0.0567542	0.104293	0.0475393
mean	3.1	0.028029	0.00206265	-0.0259663	0.0623737	0.00403253	-0.0583411	0.0501303	0.00372351	-0.0464068	0.049033	0.0175208	-0.0315122	0.0701561	0.0311611	-0.038995	0.177274	0.149237	-0.0280373	0.266613	0.253777	-0.0128353	0.0542623	0.0243879	-0.0298744	0.0975755	0.0786171	-0.0189584	0.0477719	0.0654311	0.0176592	0.0346545	0.0701253	0.0354708	0.0369035	0.0856689	0.0487653	0.0969018	0.12739	0.0304883	0.0760488	0.0842338	0.00818499	0.0307474	0.102984	0.0722368	0.043709	0.0653954	0.0216863
mean	3.3	0.0297889	0.00200583	-0.0277831	0.0483473	0.00471895	-0.0436284	0.0533375	0.00746568	-0.0458718	0.0296547	0.00549797	-0.0241567	0.103938	0.0458524	-0.0580858	0.189598	0.135729	-0.0538694	0.222381	0.210294	-0.0120865	0.0473062	0.021526	-0.0257802	0.0718336	0.0554288	-0.0164048	0.0511933	0.0815222	0.030329	0.0336575	0.0709563	0.0372987	0.0409466	0.0992867	0.0583401	0.0851491	0.107559	0.0224103	0.0655795	0.0940479	0.0284684	0.033683	0.0780973	0.0444143	0.0490531	0.103158	0.0541048
mean	3.5	0.0281323	0.00230761	-0.0258246	0.0467378	0.00442818	-0.0423096	0.0543302	0.00452688	-0.0498033	0.0489172	0.00710153	-0.0418157	0.0856511	0.0187315	-0.0669196	0.223439	0.18925	-0.034189	0.269869	0.243436	-0.0264338	0.0428188	0.0205489	-0.0222699	0.0704677	0.0573203	-0.0131474	0.0451449	0.0499943	0.00484942	0.0362705	0.0541946	0.0179241	0.047419	0.142108	0.0946892	0.0642712	0.0743141	0.0100428	0.0530386	0.0804561	0.0274175	NaN	NaN	NaN	0.0428297	0.0613704	0.0185407
mean	3.7	0.0283586	0.00262076	-0.0257378	0.0451738	0.00327981	-0.041894	0.0436088	0.00480001	-0.0388088	0.0321791	0.0150511	-0.0171281	0.0919837	0.0508304	-0.0411532	0.19927	0.150078	-0.0491919	0.234357	0.197576	-0.0367811	0.0425808	0.018252	-0.0243288	0.0901918	0.081113	-0.00907879	0.0472195	0.0516102	0.00439072	0.0389034	0.0652366	0.0263332	0.0350977	0.0952079	0.0601102	0.0766469	0.0861588	0.0095119	0.0617671	0.0850448	0.0232777	0.0442158	0.139117	0.0949008	0.0441949	0.0725444	0.0283495
mean	3.9	0.0245058	0.00230356	-0.0222023	0.0482737	0.00430225	-0.0439714	0.0526124	0.00505736	-0.0475551	NaN	NaN	NaN	0.0749607	0.0455869	-0.0293738	0.216101	0.140758	-0.075343	0.22755	0.180234	-0.0473155	0.0555896	0.0295696	-0.0260201	0.0731962	0.066261	-0.00693516	0.0424021	0.0468575	0.0044554	0.035127	0.0538646	0.0187376	0.0302751	0.0733615	0.0430864	0.0956138	0.110455	0.0148411	0.0608275	0.0889058	0.0280784	NaN	NaN	NaN	0.0387316	0.0371297	-0.00160185
mean	4.1	0.0279998	0.00239707	-0.0256027	0.035752	0.00430502	-0.031447	0.0441458	0.00744098	-0.0367048	0.0380841	0.00719085	-0.0308933	0.0704763	0.0392854	-0.0311909	0.159683	0.1152	-0.0444827	0.191915	0.174422	-0.0174937	0.0392707	0.017765	-0.0215057	0.0680381	0.05292	-0.0151181	0.0515769	0.0573803	0.0058034	0.0435434	0.0700675	0.0265241	0.0384669	0.0925897	0.0541228	0.0820103	0.106338	0.0243273	0.0593009	0.0870372	0.0277364	0.0323005	0.0790968	0.0467963	0.038281	0.0655898	0.0273088
mean	4.3	0.0282384	0.00198334	-0.026255	0.0472608	0.00502373	-0.042237	0.0458262	0.00736013	-0.038466	0.0382396	0.0104518	-0.0277878	0.0446325	0.0155826	-0.0290499	0.185337	0.129171	-0.056166	0.253888	0.243503	-0.0103842	0.0398606	0.0175666	-0.022294	0.0718017	0.0513313	-0.0204704	0.041955	0.0668535	0.0248985	0.0400692	0.0534213	0.013352	0.0353307	0.0708285	0.0354978	0.0757038	0.071231	-0.0044728	0.0475086	0.0635394	0.0160308	0.0323979	0.083106	0.0507081	0.0394751	0.0499863	0.0105112
mean	4.5	0.0309378	0.00259991	-0.0283378	0.0384803	0.00429455	-0.0341858	0.0416905	0.0071943	-0.0344962	0.0395665	0.00785229	-0.0317143	0.074689	0.0357933	-0.0388957	0.174937	0.129385	-0.0455519	0.205661	0.197576	-0.00808571	0.0374948	0.0194819	-0.0180129	0.064818	0.0479564	-0.0168616	0.0396453	0.0526044	0.0129591	0.0351304	0.0708252	0.0356947	0.0431391	0.0845351	0.0413959	0.0654891	0.0788563	0.0133672	0.0573405	0.0655832	0.00824267	0.0425418	0.114949	0.072407	0.044435	0.0937373	0.0493023
mean	4.7	0.034008	0.00175768	-0.0322504	0.0503152	0.00530856	-0.0450067	0.0556227	0.0109368	-0.0446859	0.0423572	0.0140946	-0.0282626	0.120951	0.0667415	-0.0542099	0.182463	0.150621	-0.0318419	0.231668	0.207897	-0.0237707	0.0369486	0.0243315	-0.0126171	0.0769325	0.0667666	-0.0101659	0.0326919	0.0357342	0.00304229	0.0347878	0.0627469	0.0279591	0.0377709	0.0745867	0.0368158	0.0621074	0.0692152	0.00710781	0.0540205	0.0675086	0.0134881	0.033798	0.0904098	0.0566118	0.0229215	0.0445868	0.0216652
mean	4.9	0.0304671	0.00143701	-0.0290301	0.0527515	0.0045016	-0.0482499	0.0473835	0.0134845	-0.033899	0.0280829	0.0136798	-0.0144032	0.0780328	0.0336595	-0.0443733	0.16237	0.103443	-0.058927	0.181242	0.165871	-0.0153712	0.0335981	0.0182147	-0.0153834	0.065323	0.0475301	-0.0177929	0.0467824	0.0546067	0.00782425	0.0368774	0.0554458	0.0185684	0.0288151	0.0491208	0.0203057	0.061452	0.0529149	-0.00853716	0.0522986	0.056812	0.00451343	0.0211161	0.066785	0.0456689	0.0263132	0.0284156	0.00210241
mean	5.1	0.0280733	0.00231652	-0.0257568	0.059911	0.00228074	-0.0576303	0.0503386	0.0079724	-0.0423662	0.0423555	0.00870129	-0.0336542	0.086173	0.0499809	-0.0361921	0.149344	0.10944	-0.039904	0.264544	0.247185	-0.0173584	0.0307969	0.0232544	-0.00754256	0.0630786	0.0647452	0.00166654	0.0325582	0.0427627	0.0102045	0.0412745	0.085441	0.0441665	0.0337052	0.0466222	0.012917	0.0606338	0.0446762	-0.0159576	0.0569565	0.0625878	0.00563124	0.0347522	0.0999841	0.0652319	0.0275739	0.0387678	0.0111939
mean	5.3	0.0334179	0.0030239	-0.030394	0.0435811	0.0034382	-0.0401429	0.0536108	0.00658574	-0.047025	0.0395142	0.0111629	-0.0283513	0.0599128	0.0214562	-0.0384567	0.113778	0.0609165	-0.052861	0.176729	0.165094	-0.0116344	0.0389589	0.0252652	-0.0136936	0.0623668	0.0465824	-0.0157844	0.0416066	0.0454266	0.00381995	0.0297015	0.038584	0.00888242	0.0405085	0.0865339	0.0460255	0.0577619	0.0632616	0.00549969	0.0467559	0.0704619	0.0237059	0.0303751	0.106364	0.0759885	0.031997	0.055832	0.0238351
mean	5.5	0.0288609	0.00305648	-0.0258044	0.0556099	0.00322288	-0.052387	0.0336414	0.00856451	-0.0250769	0.0376565	0.0105339	-0.0271226	0.0829907	0.0272365	-0.0557542	0.125914	0.0749777	-0.0509366	0.201034	0.159531	-0.0415035	0.031573	0.0101795	-0.0213935	0.0487309	0.0474727	-0.00125823	0.0376853	0.0373071	-0.000378274	0.0356783	0.0631287	0.0274505	0.0340808	0.079105	0.0450242	0.0552728	0.0695408	0.0142681	0.0413573	0.0417821	0.000424759	0.0421811	0.0933548	0.0511738	0.0342655	0.0386211	0.00435559
se	0.1	0.0478495	0.0337954	0.0422604	0.0261431	0.0145569	0.0246648	0.0219796	0.0205286	0.0232992	0.0171426	0.0145476	0.018377	0.0226575	0.0221685	0.025205	0.0394801	0.0449346	0.0374132	0.0395899	0.0647344	0.0498683	0.0333954	0.0301371	0.0314976	0.0488449	0.0693792	0.0513668	0.0179116	0.0287222	0.0246161	0.0139132	0.0271372	0.0275904	0.0142429	0.0276074	0.0221507	0.0159399	0.0273564	0.0223959	0.0166569	0.0283751	0.0245859	0.0108505	0.0378731	0.0358988	0.0149348	0.0339279	0.0279231
se	0.3	0.0375169	0.0271073	0.0321564	0.0239034	0.0188042	0.0230813	0.0224695	0.0233344	0.0218135	0.015346	0.013469	0.0160771	0.0240901	0.0237842	0.0269207	0.0501878	0.0865817	0.0841616	0.0596472	0.103428	0.0840763	0.0255505	0.0259674	0.0233095	0.0414841	0.0616733	0.0458011	0.0219729	0.0327872	0.0251961	0.0164642	0.0343639	0.03384	0.0211431	0.0410726	0.0315599	0.0265061	0.039914	0.0292724	0.0270782	0.0456268	0.0357534	0.013371	0.0541834	0.0521969	0.0189864	0.0493646	0.040574
se	0.5	0.0080098	0.00464389	0.00735928	0.00750886	0.00526109	0.00701709	0.00907487	0.00746731	0.00804187	0.00844644	0.0070566	0.00781294	0.0123323	0.0110905	0.0103303	0.0168922	0.0198186	0.0156322	0.0142993	0.0195525	0.0151568	0.00732817	0.00790518	0.00635157	0.00930608	0.0108827	0.00853786	0.0054512	0.00920581	0.00812142	0.00384608	0.00807886	0.00729412	0.00426593	0.00954482	0.00822287	0.00410148	0.00739934	0.00590402	0.00511431	0.00862324	0.00663029	0.00329231	0.0107699	0.00943062	0.00491581	0.0117914	0.00914281
se	0.7	0.0190229	0.0152969	0.0157	0.0118836	0.0116823	0.0110753	0.0196445	0.0176193	0.0169774	0.0179492	0.0159377	0.0159574	0.026584	0.0275114	0.0200984	0.0553498	0.097344	0.0908097	NaN	NaN	NaN	0.0214581	0.0305349	0.0205006	0.0464629	0.0526109	0.0352232	0.025815	0.0325407	0.0294763	0.0193855	0.0373117	0.0299773	0.026734	0.0467029	0.0337351	0.0382999	0.0544163	0.0364263	0.0482916	0.0647798	0.0387764	0.0269814	0.0728286	0.0529556	0.0275018	0.05795	0.0442165
se	0.9	0.00677287	0.00462668	0.00515349	0.00638079	0.00581483	0.00545382	0.00952737	0.00935318	0.00772045	0.00896568	0.00878114	0.00788512	0.0120576	0.011237	0.00980273	0.0167937	0.0195985	0.0142929	0.0175669	0.0249225	0.0171669	0.00811968	0.00883689	0.0070139	0.0114294	0.0138359	0.00904983	0.00627931	0.0103241	0.00877852	0.00354351	0.00813024	0.00705577	0.00503887	0.0105804	0.00884845	0.00531439	0.00903103	0.00670106	0.00695483	0.0111112	0.00818693	0.00331883	0.00861404	0.00705563	0.00640921	0.0133861	0.0100598
se	1.1	0.00987182	0.00799357	0.00724776	0.0128289	0.0103146	0.0109985	0.0150235	0.0159618	0.0121201	0.0227475	0.0214566	0.0174759	0.0602703	0.0613782	0.0459824	NaN	NaN	NaN	NaN	NaN	NaN	0.0315628	0.0375217	0.0269152	NaN	NaN	NaN	NaN	NaN	NaN	NaN	NaN	NaN	NaN	NaN	NaN	NaN	NaN	NaN	NaN	NaN	NaN	NaN	NaN	NaN	NaN	NaN	NaN
se	1.3	0.00477375	0.00321698	0.00386407	0.00558784	0.00377693	0.00510646	0.00868645	0.00839726	0.00662152	0.0116455	0.00971989	0.00941388	0.0173688	0.0163285	0.0156258	0.0254348	0.0292821	0.0204553	0.0266827	0.0343308	0.0234581	0.00846785	0.00835887	0.00713005	0.0147939	0.0180625	0.0118377	0.00818786	0.0141792	0.0114351	0.00498346	0.0124859	0.0104953	0.00701141	0.0170818	0.0141427	0.00813474	0.0138873	0.0103062	0.0106231	0.0178567	0.0130411	0.00597212	0.0151003	0.011765	0.00984434	0.0213721	0.0162044
se	1.5	0.00497678	0.00296815	0.00464319	0.0066658	0.00432116	0.00617959	0.00940489	0.00827684	0.0077453	0.0217232	0.0169335	0.0189747	0.0245337	0.0255501	0.0211241	0.0385757	0.0423758	0.0332954	0.0358689	0.0476682	0.0308764	0.0139381	0.0146012	0.0109877	0.0232169	0.0275438	0.0167686	0.0132055	0.0242975	0.0198439	0.00796149	0.020507	0.0171395	0.0131721	0.0256984	0.0211814	0.0166823	0.0313987	0.0221707	0.0175479	0.0270597	0.0185991	0.00869278	0.0246732	0.0197063	0.0180745	0.0345062	0.0240705
se	1.7	0.00373053	0.00136109	0.00378507	0.00516156	0.00194225	0.00522217	0.00672424	0.00558231	0.0061018	0.0149819	0.0104789	0.0132637	0.020464	0.0191858	0.0170342	0.0301557	0.034732	0.0252899	0.0270813	0.0323247	0.0205795	0.00859609	0.0078123	0.00727037	0.0141426	0.0174821	0.0124993	0.00762323	0.0139486	0.0111931	0.0056685	0.0138587	0.0114496	0.00760348	0.0198732	0.0162035	0.011823	0.0198637	0.0130129	0.0117286	0.0205927	0.0145843	0.00697627	0.0212803	0.017235	0.0110099	0.0265227	0.0198249
se	1.9	0.00503094	0.0012762	0.00519715	0.00703518	0.00403239	0.0068499	0.00893367	0.00635821	0.00847534	0.018545	0.0114572	0.0183114	0.0428462	0.0394662	0.0311603	0.0561308	0.0651085	0.0409842	0.0534918	0.0583699	0.0525476	0.0185108	0.0211385	0.0130465	0.0235142	0.0302991	0.0206362	0.0135103	0.0260789	0.0204772	0.00880219	0.0246985	0.0223447	0.0115269	0.031471	0.0279115	0.0246139	0.0501816	0.0398895	0.0258393	0.0477264	0.033732	0.0124526	0.0399479	0.0308595	0.0193324	0.0364415	0.0243408
se	2.1	0.0043859	0.000980618	0.00445978	0.00521595	0.00211015	0.00527212	0.00667186	0.00478744	0.00626435	0.0191692	0.013793	0.0175297	0.021145	0.0164862	0.0179261	0.0285166	0.0345735	0.0227711	0.0279959	0.0334809	0.02594	0.00815975	0.00853998	0.00609473	0.0160335	0.0189576	0.011321	0.00714313	0.0144762	0.011518	0.00626245	0.0139025	0.012211	0.00826705	0.0200083	0.016663	0.0137909	0.0233644	0.0153813	0.0126576	0.0269411	0.0202174	0.00997177	0.0272703	0.0203301	0.0147755	0.0307527	0.0222682
se	2.3	0.00486598	0.00138338	0.00494515	0.00596729	0.00219017	0.00624854	0.00824438	0.00480963	0.00816705	0.0369724	0.0132175	0.0364492	0.0372254	0.0295363	0.0330117	0.0542766	0.0625763	0.0415088	0.0643324	0.0706973	0.0598935	0.0180664	0.0204801	0.010822	0.0419649	0.0494133	0.0268048	0.0164183	0.0349739	0.0264024	0.0122078	0.0234615	0.0223106	0.0162537	0.0433766	0.0357056	0.0282689	0.0563948	0.0497742	0.0385363	0.06018	0.0354296	0.0182215	0.0603964	0.0512765	0.0208062	0.0511949	0.035056
se	2.5	0.00443844	0.0010975	0.00454213	0.00576921	0.00191865	0.00590344	0.00747703	0.00450396	0.00755073	0.0202397	0.00781228	0.0203352	0.0397693	0.0377731	0.0241659	0.0428237	0.0484998	0.0269364	0.0381112	0.0503902	0.0333196	0.00809682	0.00770076	0.00589571	0.0165426	0.0221199	0.0123324	0.0113424	0.0213217	0.0168881	0.00845047	0.0201981	0.0181178	0.00957894	0.0305181	0.0261209	0.0186717	0.0321254	0.0226857	0.0202561	0.0328009	0.0221645	0.0110257	0.0285916	0.0223911	0.0171776	0.0387009	0.0288648
se	2.7	0.00510846	0.000763561	0.00516477	0.00742819	0.0017258	0.00750008	0.00754658	0.00400865	0.00804982	0.0206476	0.0198773	0.0133496	0.0330869	0.036004	0.030531	0.0485795	0.0532173	0.041616	0.0531168	0.0681379	0.0395459	0.0118071	0.0117534	0.00920531	0.0233987	0.0289345	0.0186398	0.016281	0.0259059	0.0181993	0.0091159	0.02194	0.0192552	0.0132995	0.038246	0.0316237	0.0249964	0.0458313	0.0320233	0.0203429	0.0413408	0.0283811	0.0140901	0.0519013	0.0419569	0.0203774	0.0489937	0.0369167
se	2.9	0.0042319	0.000885329	0.00431901	0.00613172	0.00159085	0.00611873	0.00756688	0.00363825	0.0075301	0.0160728	0.00912271	0.015292	0.0257828	0.023422	0.0221422	0.0374546	0.0419996	0.0253824	0.0333399	0.0410215	0.0297786	0.00774857	0.00750888	0.00688158	0.013815	0.0180452	0.0113811	0.00980522	0.0205365	0.015903	0.00600943	0.0168298	0.0145286	0.00775535	0.027357	0.0232236	0.0146084	0.02724	0.0218805	0.0215588	0.0356806	0.0229757	0.0106378	0.0338855	0.0268788	0.0157908	0.0410736	0.0311158
se	3.1	0.00521908	0.000885196	0.00532763	0.00887138	0.00168861	0.00888008	0.00851925	0.00181531	0.0087076	0.026422	0.016234	0.026901	0.0393902	0.0330055	0.0314489	0.0557798	0.0684519	0.0468304	0.0601396	0.0739996	0.0503612	0.0130701	0.012432	0.0125655	0.0285521	0.031768	0.0197072	0.0154396	0.0313689	0.0277221	0.00912637	0.0246127	0.0228733	0.0138666	0.0389902	0.0305265	0.0342004	0.0560259	0.0382533	0.0307559	0.0575439	0.0410109	0.0145537	0.0602986	0.0501296	0.0209015	0.0358854	0.0259652
se	3.3	0.00469985	0.000756999	0.00474786	0.00665627	0.00164461	0.00686637	0.00813745	0.00436975	0.00771935	0.0133415	0.00390778	0.0136605	0.0292468	0.0244215	0.0239669	0.0409676	0.0437179	0.0287106	0.0338551	0.0424302	0.0276374	0.00752113	0.00707689	0.00718535	0.0141969	0.0165375	0.0109255	0.009156	0.020754	0.0161738	0.00560785	0.0166536	0.0146269	0.00879771	0.0251559	0.0219608	0.0201745	0.0351349	0.028653	0.0157562	0.0286777	0.020618	0.00978786	0.0314551	0.0249591	0.015676	0.0456044	0.0343581
se	3.5	0.00590731	0.0011401	0.00605385	0.00805393	0.00188208	0.00818264	0.0104607	0.00280043	0.0106726	0.0227399	0.00609274	0.0235526	0.0447162	0.0234694	0.0418016	0.0617972	0.0732849	0.0504132	0.0586192	0.0751739	0.0521214	0.0129607	0.014112	0.011972	0.0218049	0.027176	0.0168143	0.0147405	0.0269863	0.02219	0.0139244	0.024806	0.0228477	0.0193931	0.0626837	0.0495859	0.0258441	0.0448004	0.0325065	0.0208748	0.0445743	0.0343076	NaN	NaN	NaN	0.020027	0.0499732	0.041707
se	3.7	0.00533689	0.00105167	0.00550399	0.0072583	0.00138086	0.00739017	0.00833338	0.00264688	0.00879804	0.0146735	0.0121286	0.0141752	0.0343598	0.0358135	0.0271429	0.0460969	0.049759	0.0308602	0.0404272	0.0506129	0.0345708	0.00970355	0.00853722	0.00938969	0.0212885	0.0254175	0.0162408	0.0114313	0.0187863	0.0146279	0.00886582	0.0207032	0.0173545	0.00825671	0.0291714	0.0246041	0.0217068	0.033078	0.01885	0.0205407	0.0338817	0.0212262	0.0146283	0.0513265	0.040538	0.0186818	0.0420947	0.0291561
se	3.9	0.00636126	0.00145924	0.00644392	0.00934961	0.0020537	0.00952616	0.0116885	0.00343167	0.0119597	NaN	NaN	NaN	0.0629106	0.066803	0.0626286	0.0754174	0.0730304	0.0621257	0.0581368	0.0696884	0.0621375	0.0184258	0.0214629	0.0137065	0.0328134	0.0408715	0.0206518	0.0158878	0.0285307	0.0275956	0.0119574	0.0260395	0.0243479	0.012798	0.0384884	0.0321159	0.0458541	0.0692343	0.0374675	0.0285754	0.0634658	0.0479703	NaN	NaN	NaN	0.0198999	0.0324315	0.0287585
se	4.1	0.00516035	0.000966889	0.00524573	0.00694182	0.00203825	0.00721968	0.00876185	0.00537588	0.00836561	0.0185019	0.00721755	0.0181216	0.0351432	0.0323516	0.0200266	0.0369722	0.0380044	0.0247997	0.0313597	0.038467	0.0252469	0.00719545	0.00716864	0.00682135	0.0154415	0.018228	0.0103457	0.0114881	0.0156966	0.0121816	0.00845365	0.0176436	0.0148372	0.00881681	0.0280901	0.0232785	0.0189648	0.0328981	0.0239197	0.0183593	0.0378665	0.0277064	0.0105546	0.0347509	0.0273347	0.0129665	0.0344231	0.0249333
se	4.3	0.00728342	0.00102832	0.00734653	0.0107248	0.00281193	0.0113331	0.0117886	0.00443116	0.012616	0.0236828	0.0153526	0.0215383	0.0269249	0.018925	0.0235594	0.0577373	0.0633054	0.0510992	0.0610558	0.0793791	0.0574336	0.0127602	0.00960318	0.0125725	0.0253749	0.0288888	0.0190631	0.0140999	0.0336992	0.027689	0.0106488	0.0209384	0.0199238	0.0147768	0.0343616	0.0270279	0.0315504	0.0364307	0.0296237	0.0160413	0.0379234	0.0310009	0.0252772	0.0735082	0.0553269	0.0192979	0.0423124	0.0328485
se	4.5	0.00642425	0.00162073	0.00652484	0.00883962	0.00240573	0.00880714	0.00969524	0.00494925	0.0105956	0.0249868	0.00685326	0.0255055	0.0336608	0.0266876	0.0278686	0.047443	0.0493647	0.0268793	0.0349273	0.0463426	0.0317153	0.00967595	0.0105204	0.00934791	0.0165638	0.0212389	0.0141455	0.0132932	0.025753	0.0223126	0.00828702	0.0217598	0.0188239	0.0102192	0.0282872	0.0231618	0.0219303	0.0342507	0.0232693	0.019538	0.0295184	0.0185014	0.019444	0.0585427	0.0448285	0.0172503	0.0477197	0.0363888
se	4.7	0.00705118	0.000881482	0.007198	0.0121658	0.00365171	0.0121405	0.012927	0.0083432	0.0125523	0.0218325	0.0135852	0.024546	0.0552603	0.0520461	0.0462726	0.0575423	0.0665428	0.0375761	0.0521276	0.0631099	0.0422846	0.0123715	0.0154371	0.00947367	0.0237244	0.0295402	0.0145995	0.01016	0.0161663	0.0150236	0.00711838	0.0203881	0.0189989	0.0117878	0.0304442	0.0247977	0.0198474	0.029616	0.0194868	0.0164761	0.0326043	0.0239102	0.0174299	0.0560303	0.042764	0.0140895	0.0380027	0.0295245
se	4.9	0.00640026	0.000754478	0.00648198	0.011536	0.00248521	0.0119679	0.0133773	0.00996145	0.0157239	0.0134678	0.0105045	0.0131388	0.0373807	0.0304086	0.0262207	0.0402894	0.0395136	0.0291891	0.0373878	0.0488721	0.032448	0.00892374	0.0113248	0.0090262	0.0159078	0.0194969	0.0129445	0.0123509	0.0196953	0.0149217	0.00739325	0.0170266	0.0139298	0.006994	0.0189994	0.0166946	0.0176157	0.0228679	0.0153381	0.0194244	0.0273278	0.0204578	0.00733156	0.0321251	0.0272981	0.0118177	0.0291551	0.0239565
se	5.1	0.00785239	0.00132131	0.00797143	0.0191632	0.00178767	0.0193605	0.0181628	0.00955152	0.0179784	0.0287742	0.00993582	0.0285855	0.0523011	0.0521097	0.0289361	0.0554828	0.056123	0.0342599	0.0738577	0.0888328	0.0674489	0.0129722	0.0188135	0.0138311	0.0269071	0.0382756	0.0213014	0.0129518	0.0237352	0.0202283	0.0142987	0.0319348	0.0274106	0.0143133	0.0330092	0.0319093	0.0244109	0.0287008	0.0254772	0.0358652	0.063575	0.0430131	0.0184409	0.0716939	0.059864	0.0187116	0.0360848	0.0248721
se	5.3	0.00775553	0.00214837	0.00792422	0.0126275	0.00240507	0.0128617	0.0150948	0.00566153	0.0165456	0.021488	0.0121761	0.0186993	0.0334621	0.0220917	0.0290386	0.0414827	0.035967	0.0340318	0.0429599	0.0556316	0.0376727	0.0144415	0.0205422	0.0114834	0.0196409	0.0248827	0.0133768	0.0138818	0.0204489	0.0136154	0.00630812	0.0155339	0.0148966	0.0119849	0.034883	0.0295497	0.0205681	0.0303653	0.0223164	0.0245912	0.038042	0.0251233	0.0137906	0.0604946	0.0503774	0.0125005	0.0375951	0.0328477
se	5.5	0.00759088	0.00186203	0.00778003	0.0163669	0.0022979	0.0165947	0.012023	0.00667334	0.0128813	0.0269108	0.0105392	0.0264295	0.0388902	0.0228951	0.0386317	0.0448347	0.0454338	0.035693	0.0509409	0.0577211	0.0436828	0.0083266	0.00771077	0.00905746	0.0163925	0.0221003	0.0115706	0.0130465	0.0166715	0.0133665	0.0096473	0.0213151	0.0180558	0.00947971	0.0338647	0.0284089	0.0187951	0.0321261	0.023829	0.0135929	0.0204019	0.0151519	0.0208966	0.0627504	0.0499506	0.0139123	0.0227896	0.0154178
n	0.1	170	170	170	223	223	223	388	388	388	1014	1014	1014	564	564	564	215	215	215	123	123	123	203	203	203	108	108	108	261	261	261	376	376	376	543	543	543	364	364	364	295	295	295	323	323	323	301	301	301
n	0.3	159	159	159	308	308	308	397	397	397	876	876	876	454	454	454	106	106	106	57	57	57	260	260	260	119	119	119	208	208	208	207	207	207	252	252	252	235	235	235	196	196	196	142	142	142	183	183	183
n	0.5	1399	1399	1399	2011	2011	2011	1719	1719	1719	2506	2506	2506	1638	1638	1638	1199	1199	1199	1035	1035	1035	1958	1958	1958	1616	1616	1616	2128	2128	2128	3081	3081	3081	3486	3486	3486	3873	3873	3873	3604	3604	3604	1850	1850	1850	1954	1954	1954
n	0.7	348	348	348	662	662	662	541	541	541	591	591	591	296	296	296	92	92	92	40	40	40	398	398	398	168	168	168	136	136	136	172	172	172	177	177	177	112	112	112	133	133	133	59	59	59	135	135	135
n	0.9	1507	1507	1507	1926	1926	1926	1416	1416	1416	1617	1617	1617	1209	1209	1209	1098	1098	1098	838	838	838	1598	1598	1598	1636	1636	1636	1901	1901	1901	2513	2513	2513	2568	2568	2568	2842	2842	2842	2026	2026	2026	1728	1728	1728	1781	1781	1781
n	1.1	502	502	502	502	502	502	606	606	606	299	299	299	68	68	68	12	12	12	7	7	7	165	165	165	48	48	48	48	48	48	28	28	28	13	13	13	22	22	22	34	34	34	8	8	8	12	12	12
n	1.3	1367	1367	1367	1364	1364	1364	1325	1325	1325	637	637	637	527	527	527	538	538	538	493	493	493	1099	1099	1099	977	977	977	1055	1055	1055	1264	1264	1264	1089	1089	1089	1274	1274	1274	1024	1024	1024	745	745	745	838	838	838
n	1.5	866	866	866	959	959	959	862	862	862	243	243	243	217	217	217	269	269	269	208	208	208	492	492	492	373	373	373	448	448	448	502	502	502	405	405	405	403	403	403	346	346	346	287	287	287	314	314	314
n	1.7	1347	1347	1347	1424	1424	1424	1038	1038	1038	412	412	412	380	380	380	519	519	519	458	458	458	952	952	952	957	957	957	961	961	961	937	937	937	846	846	846	846	846	846	684	684	684	513	513	513	614	614	614
n	1.9	896	896	896	951	951	951	583	583	583	148	148	148	126	126	126	150	150	150	161	161	161	336	336	336	293	293	293	248	248	248	264	264	264	221	221	221	187	187	187	158	158	158	152	152	152	160	160	160
n	2.1	1221	1221	1221	1373	1373	1373	906	906	906	331	331	331	340	340	340	451	451	451	506	506	506	944	944	944	780	780	780	818	818	818	847	847	847	677	677	677	641	641	641	478	478	478	385	385	385	376	376	376
n	2.3	751	751	751	893	893	893	547	547	547	93	93	93	82	82	82	115	115	115	98	98	98	267	267	267	147	147	147	189	189	189	143	143	143	148	148	148	101	101	101	89	89	89	82	82	82	66	66	66
n	2.5	885	885	885	1089	1089	1089	676	676	676	166	166	166	170	170	170	238	238	238	293	293	293	553	553	553	466	466	466	481	481	481	437	437	437	324	324	324	291	291	291	290	290	290	194	194	194	217	217	217
n	2.7	702	702	702	714	714	714	547	547	547	109	109	109	96	96	96	192	192	192	191	191	191	414	414	414	289	289	289	285	285	285	277	277	277	237	237	237	166	166	166	162	162	162	134	134	134	124	124	124
n	2.9	1001	1001	1001	983	983	983	724	724	724	194	194	194	247	247	247	351	351	351	381	381	381	690	690	690	579	579	579	600	600	600	595	595	595	449	449	449	357	357	357	306	306	306	265	265	265	191	191	191
n	3.1	662	662	662	612	612	612	433	433	433	104	104	104	87	87	87	111	111	111	154	154	154	313	313	313	208	208	208	178	178	178	241	241	241	157	157	157	141	141	141	90	90	90	69	69	69	80	80	80
n	3.3	867	867	867	836	836	836	589	589	589	173	173	173	217	217	217	277	277	277	386	386	386	702	702	702	521	521	521	524	524	524	527	527	527	430	430	430	315	315	315	268	268	268	215	215	215	205	205	205
n	3.5	538	538	538	504	504	504	326	326	326	94	94	94	67	67	67	121	121	121	140	140	140	261	261	261	198	198	198	145	145	145	198	198	198	108	108	108	101	101	101	95	95	95	48	48	48	52	52	52
n	3.7	666	666	666	616	616	616	400	400	400	130	130	130	144	144	144	229	229	229	251	251	251	468	468	468	350	350	350	321	321	321	384	384	384	319	319	319	266	266	266	204	204	204	158	158	158	166	166	166
n	3.9	450	450	450	433	433	433	221	221	221	44	44	44	54	54	54	94	94	94	127	127	127	205	205	205	123	123	123	116	116	116	136	136	136	113	113	113	105	105	105	68	68	68	27	27	27	56	56	56
n	4.1	696	696	696	570	570	570	407	407	407	123	123	123	152	152	152	260	260	260	361	361	361	541	541	541	434	434	434	410	410	410	480	480	480	331	331	331	358	358	358	212	212	212	213	213	213	206	206	206
n	4.3	399	399	399	319	319	319	192	192	192	74	74	74	94	94	94	116	116	116	114	114	114	220	220	220	172	172	172	148	148	148	219	219	219	138	138	138	149	149	149	83	83	83	54	54	54	101	101	101
n	4.5	538	538	538	422	422	422	263	263	263	119	119	119	121	121	121	201	201	201	251	251	251	350	350	350	316	316	316	213	213	213	409	409	409	288	288	288	216	216	216	186	186	186	108	108	108	160	160	160
n	4.7	426	426	426	308	308	308	220	220	220	79	79	79	95	95	95	146	146	146	191	191	191	336	336	336	256	256	256	240	240	240	312	312	312	239	239	239	225	225	225	146	146	146	91	91	91	109	109	109
n	4.9	451	451	451	373	373	373	192	192	192	108	108	108	121	121	121	236	236	236	255	255	255	314	314	314	312	312	312	326	326	326	397	397	397	314	314	314	241	241	241	171	171	171	154	154	154	127	127	127
n	5.1	283	283	283	176	176	176	108	108	108	53	53	53	69	69	69	88	88	88	103	103	103	172	172	172	146	146	146	141	141	141	202	202	202	113	113	113	130	130	130	57	57	57	68	68	68	83	83	83
n	5.3	359	359	359	247	247	247	164	164	164	108	108	108	81	81	81	154	154	154	186	186	186	253	253	253	257	257	257	278	278	278	318	318	318	199	199	199	216	216	216	145	145	145	100	100	100	124	124	124
n	5.5	297	297	297	223	223	223	164	164	164	84	84	84	94	94	94	121	121	121	179	179	179	232	232	232	248	248	248	215	215	215	295	295	295	206	206	206	197	197	197	155	155	155	58	58	58	103	103	103
[truncated: 3 more columns]
